# Supplementary material for: Triple-Negative PAM50 Non-Basal Breast Cancer Subtype Predicts Benefit from Extended Adjuvant Capecitabine
Source: PubMed Central journal article supplement — Clin Cancer Res. 2022 Nov 8;29(2):389–400. doi: 10.1158/1078-0432.CCR-22-2191 (PMC9873250; doi:10.1158/1078-0432.ccr-22-2191), 2022-11-08

**Supplementary Figure S1: Expression of the 50 genes in the PAM50 signature, obtained from the 164-gene codeset.** The prototypical PAM50 intrinsic subtypes are designated as luminal A (dark blue), luminal B (light blue), Her2-Enriched (pink), normal-like (green) and basal-like (red). The relative expression values for genes are indicated as green (low), black (neutral) and red (high).

**Supplementary Figure S1**

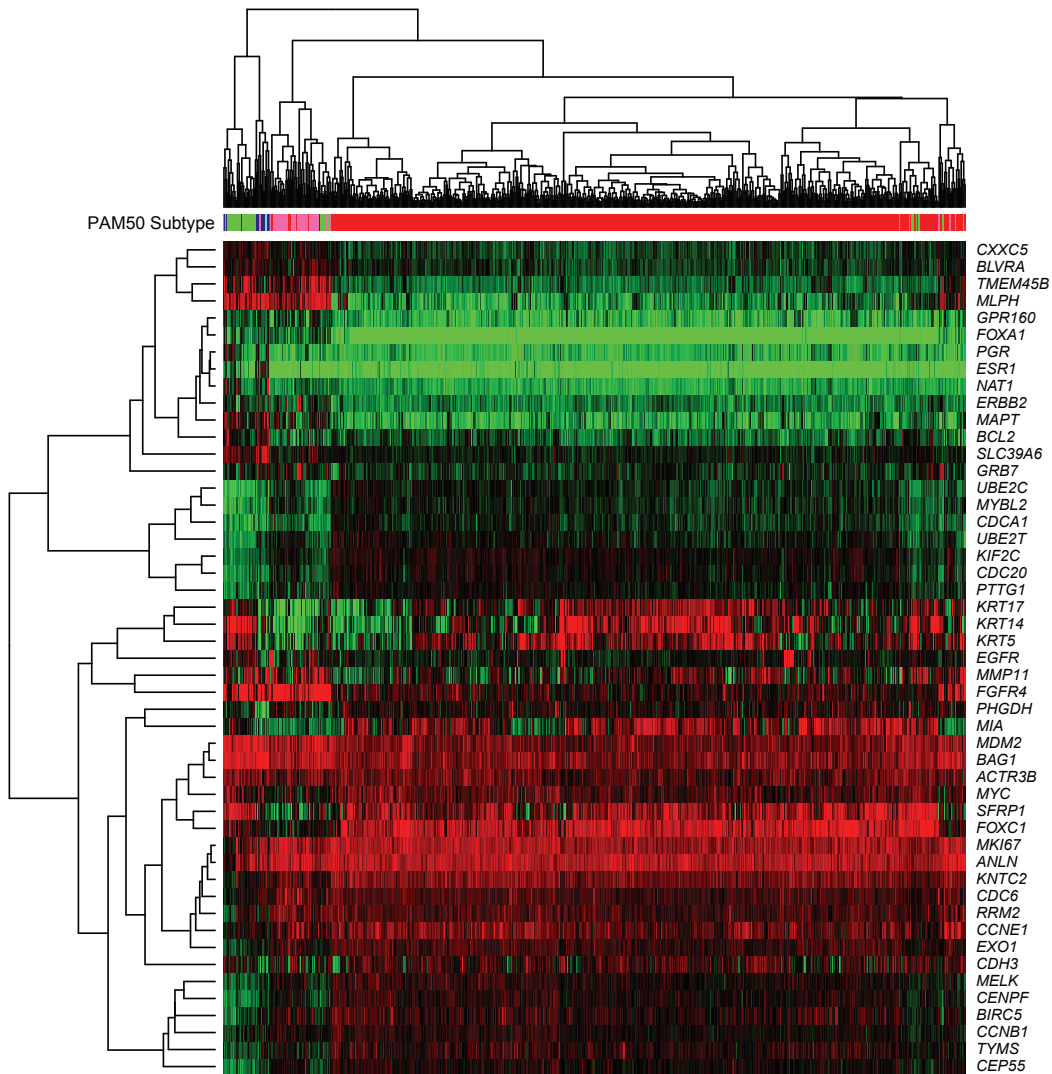

Supplement: ccr-22-2191_supplementary_figure_s1_supps1.pdf [file ccr-22-2191_supplementary_figure_s1_supps1.pdf]
