# Supplementary material for: Triple-Negative PAM50 Non-Basal Breast Cancer Subtype Predicts Benefit from Extended Adjuvant Capecitabine
Source: PubMed Central journal article supplement — Clin Cancer Res. 2022 Nov 8;29(2):389–400. doi: 10.1158/1078-0432.CCR-22-2191 (PMC9873250; doi:10.1158/1078-0432.ccr-22-2191), 2022-11-08

**Supplementary Figure S4: Forest plot of the exploratory categorical analysis of selected (meta)gene expression and their association with disease free survival on the capecitabine arm vs. observation.** Expression status was derived from the median gene expression scores. Hazard ratios, 95% confidence intervals and *P*-values are derived from Cox regression analyses adjusted for age, menopausal status, histological grade, tumor size, stage, breast surgery, region, nodal status, and chemotherapy regimen. The displayed *P*-interaction indicates results of test of heterogeneity.

**Supplementary Figure S4**

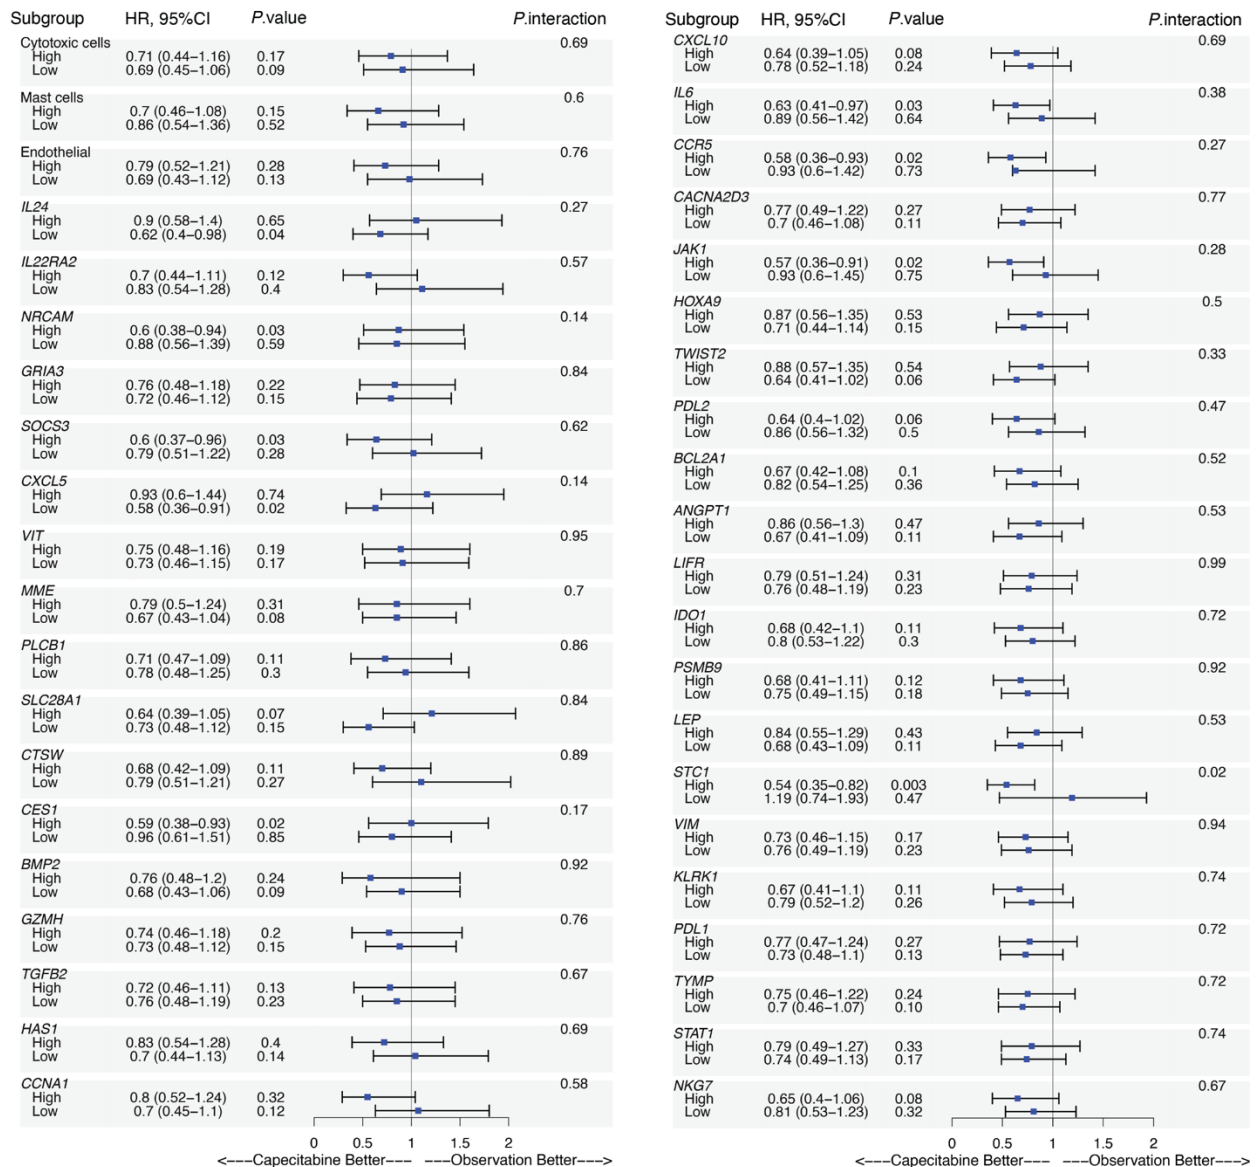

Supplement: ccr-22-2191_supplementary_figure_s4_supps4.pdf [file ccr-22-2191_supplementary_figure_s4_supps4.pdf]
