# Supplementary material for: Triple-Negative PAM50 Non-Basal Breast Cancer Subtype Predicts Benefit from Extended Adjuvant Capecitabine
Source: PubMed Central journal article supplement — Clin Cancer Res. 2022 Nov 8;29(2):389–400. doi: 10.1158/1078-0432.CCR-22-2191 (PMC9873250; doi:10.1158/1078-0432.ccr-22-2191), 2022-11-08
Supplement: ccr-22-2191_supplementary_tables_s1-s10_suppst1-10.pdf [file ccr-22-2191_supplementary_tables_s1-s10_suppst1-10.pdf]

**Triple negative PAM50 non-basal breast cancer subtype predicts benefit from extended adjuvant capecitabine**

**SUPPLEMENTARY TABLES**

**Supplementary Table S1: Gene list for the NanoString custom nCounter codeset included in the study.**

| <b>Codeset gene</b> | <b>Gene/Metagenes details</b> |
|---------------------|-------------------------------|
| <i>CTSW</i>         | Cytotoxic cells signature     |
| <i>GNLY</i>         | Cytotoxic cells signature     |
| <i>GZMA</i>         | Cytotoxic cells signature     |
| <i>GZMB</i>         | Cytotoxic cells signature     |
| <i>GZMH</i>         | Cytotoxic cells signature     |
| <i>KLRB1</i>        | Cytotoxic cells signature     |
| <i>KLRD1</i>        | Cytotoxic cells signature     |
| <i>KLRK1</i>        | Cytotoxic cells signature     |
| <i>NKG7</i>         | Cytotoxic cells signature     |
| <i>PRF1</i>         | Cytotoxic cells signature     |
| <i>BCL6B</i>        | Endothelial signature         |
| <i>CDH5</i>         | Endothelial signature         |
| <i>CLEC14A</i>      | Endothelial signature         |
| <i>CXorf36</i>      | Endothelial signature         |
| <i>FAM124B</i>      | Endothelial signature         |
| <i>KDR</i>          | Endothelial signature         |
| <i>MMRN2</i>        | Endothelial signature         |
| <i>MYCT1</i>        | Endothelial signature         |
| <i>PALMD</i>        | Endothelial signature         |
| <i>ROBO4</i>        | Endothelial signature         |
| <i>TIE1</i>         | Endothelial signature         |
| <i>CPA3</i>         | Mast cells                    |
| <i>HDC</i>          | Mast cells                    |
| <i>MS4A2</i>        | Mast cells                    |
| <i>TPSAB1</i>       | Mast cells                    |
| <i>CD8A</i>         | CD8 T cells                   |
| <i>CD8B</i>         | CD8 T cells                   |
| <i>LAG3</i>         | Exhausted CD8 T cells         |
| <i>ANGPT1</i>       | Capecitabine sensitivity      |
| <i>BCL2A1</i>       | Capecitabine sensitivity      |
| <i>BMP2</i>         | Capecitabine sensitivity      |
| <i>CACNA2D3</i>     | Capecitabine sensitivity      |
| <i>CCNA1</i>        | Capecitabine sensitivity      |
| <i>CCR5</i>         | Capecitabine sensitivity      |
| <i>CES1</i>         | Capecitabine sensitivity      |
| <i>CXCL10</i>       | Capecitabine sensitivity      |
| <i>CXCL5</i>        | Capecitabine sensitivity      |
| <i>GRIA3</i>        | Capecitabine sensitivity      |
| <i>HAS1</i>         | Capecitabine sensitivity      |
| <i>HOXA9</i>        | Capecitabine sensitivity      |
| <i>IL22RA2</i>      | Capecitabine sensitivity      |
| <i>IL24</i>         | Capecitabine sensitivity      |
| <i>IL6</i>          | Capecitabine sensitivity      |

|                   |                                   |
|-------------------|-----------------------------------|
| <i>JAK1</i>       | Capecitabine sensitivity          |
| <i>LEP</i>        | Capecitabine sensitivity          |
| <i>LIFR</i>       | Capecitabine sensitivity          |
| <i>MME (CD10)</i> | Capecitabine sensitivity          |
| <i>NRCAM</i>      | Capecitabine sensitivity          |
| <i>PLCB1</i>      | Capecitabine sensitivity          |
| <i>PSMB9</i>      | Capecitabine sensitivity          |
| <i>SLC28A1</i>    | Capecitabine sensitivity          |
| <i>SOCS3</i>      | Capecitabine sensitivity          |
| <i>STC1</i>       | Capecitabine sensitivity          |
| <i>TGFB2</i>      | Capecitabine sensitivity          |
| <i>TWIST2</i>     | Capecitabine sensitivity          |
| <i>TYMP</i>       | Capecitabine sensitivity          |
| <i>VIT</i>        | Capecitabine sensitivity          |
| <i>MAPK1</i>      | Capecitabine resistance           |
| <i>PLCE1</i>      | Capecitabine resistance           |
| <i>FXYD3</i>      | Capecitabine resistance           |
| <i>AR</i>         | Additional biologically-important |
| <i>BRCA1</i>      | Additional biologically-important |
| <i>BRCA2</i>      | Additional biologically-important |
| <i>CAV1</i>       | Additional biologically-important |
| <i>CCL5</i>       | Additional biologically-important |
| <i>CD27</i>       | Additional biologically-important |
| <i>CD274</i>      | Additional biologically-important |
| <i>CD276</i>      | Additional biologically-important |
| <i>CMKLR1</i>     | Additional biologically-important |
| <i>CXCL9</i>      | Additional biologically-important |
| <i>CXCR6</i>      | Additional biologically-important |
| <i>DDR2</i>       | Additional biologically-important |
| <i>FHL1</i>       | Additional biologically-important |
| <i>FSTL1</i>      | Additional biologically-important |
| <i>HEG1</i>       | Additional biologically-important |
| <i>HLA-DMA</i>    | Additional biologically-important |
| <i>HLA-DOA</i>    | Additional biologically-important |
| <i>HLA-DPA1</i>   | Additional biologically-important |
| <i>HLA-DPB1</i>   | Additional biologically-important |
| <i>HLA-DQA1</i>   | Additional biologically-important |
| <i>HLA-DQB1</i>   | Additional biologically-important |
| <i>HLA-DRA</i>    | Additional biologically-important |
| <i>HLA-DRB1</i>   | Additional biologically-important |
| <i>HLA-DRB5</i>   | Additional biologically-important |
| <i>HLA-E</i>      | Additional biologically-important |
| <i>IDO1</i>       | Additional biologically-important |
| <i>JAM2</i>       | Additional biologically-important |
| <i>PDCD1</i>      | Additional biologically-important |
| <i>PDCD1LG2</i>   | Additional biologically-important |
| <i>PSMB10</i>     | Additional biologically-important |
| <i>SNAI2</i>      | Additional biologically-important |
| <i>STAT1</i>      | Additional biologically-important |
| <i>TCF4</i>       | Additional biologically-important |
| <i>TIGIT</i>      | Additional biologically-important |
| <i>VCAN</i>       | Additional biologically-important |
| <i>VIM</i>        | Additional biologically-important |

|                |                 |
|----------------|-----------------|
| <i>ACTR3B</i>  | PAM50           |
| <i>ANLN</i>    | PAM50           |
| <i>BAG1</i>    | PAM50           |
| <i>BCL2</i>    | PAM50           |
| <i>BIRC5</i>   | PAM50           |
| <i>BLVRA</i>   | PAM50           |
| <i>CCNBI</i>   | PAM50           |
| <i>CCNE1</i>   | PAM50           |
| <i>CDC20</i>   | PAM50           |
| <i>CDC6</i>    | PAM50           |
| <i>CDCA1</i>   | PAM50           |
| <i>CDH3</i>    | PAM50           |
| <i>CENPF</i>   | PAM50           |
| <i>CEP55</i>   | PAM50           |
| <i>CXXC5</i>   | PAM50           |
| <i>EGFR</i>    | PAM50           |
| <i>ERBB2</i>   | PAM50           |
| <i>ESR1</i>    | PAM50           |
| <i>EXO1</i>    | PAM50           |
| <i>FGFR4</i>   | PAM50           |
| <i>FOXA1</i>   | PAM50           |
| <i>FOXC1</i>   | PAM50           |
| <i>GPR160</i>  | PAM50           |
| <i>GRB7</i>    | PAM50           |
| <i>KIF2C</i>   | PAM50           |
| <i>KNTC2</i>   | PAM50           |
| <i>KRT14</i>   | PAM50           |
| <i>KRT17</i>   | PAM50           |
| <i>KRT5</i>    | PAM50           |
| <i>MAPT</i>    | PAM50           |
| <i>MDM2</i>    | PAM50           |
| <i>MELK</i>    | PAM50           |
| <i>MIA</i>     | PAM50           |
| <i>MKI67</i>   | PAM50           |
| <i>MLPH</i>    | PAM50           |
| <i>MMP11</i>   | PAM50           |
| <i>MYBL2</i>   | PAM50           |
| <i>MYC</i>     | PAM50           |
| <i>NAT1</i>    | PAM50           |
| <i>ORC6L</i>   | PAM50           |
| <i>PGR</i>     | PAM50           |
| <i>PHGDH</i>   | PAM50           |
| <i>PTTG1</i>   | PAM50           |
| <i>RRM2</i>    | PAM50           |
| <i>SFRP1</i>   | PAM50           |
| <i>SLC39A6</i> | PAM50           |
| <i>TMEM45B</i> | PAM50           |
| <i>TYMS</i>    | PAM50           |
| <i>UBE2C</i>   | PAM50           |
| <i>UBE2T</i>   | PAM50           |
| <i>ABCF1</i>   | Reference genes |
| <i>ACTB</i>    | Reference genes |
| <i>G6PD</i>    | Reference genes |

|                        |                 |
|------------------------|-----------------|
| <b><i>GUSB</i></b>     | Reference genes |
| <b><i>MRPL19</i></b>   | Reference genes |
| <b><i>NRDE2</i></b>    | Reference genes |
| <b><i>OAZ1</i></b>     | Reference genes |
| <b><i>POLR2A</i></b>   | Reference genes |
| <b><i>PSMC4</i></b>    | Reference genes |
| <b><i>PUM1</i></b>     | Reference genes |
| <b><i>RPLP0</i></b>    | Reference genes |
| <b><i>SDHA</i></b>     | Reference genes |
| <b><i>SF3A1</i></b>    | Reference genes |
| <b><i>STK11IP</i></b>  | Reference genes |
| <b><i>TBC1D10B</i></b> | Reference genes |
| <b><i>TBP</i></b>      | Reference genes |
| <b><i>TFRC</i></b>     | Reference genes |
| <b><i>UBB</i></b>      | Reference genes |

**Supplementary Table S2: Patient characteristics in the GEICAM/CIBOMA translational study cohort versus the original trial.**

| Characteristic                        | GEICAM/CIBOMA<br>Translational<br>Population<br>(n=658) | GEICAM/CIBOMA<br>Whole<br>Population<br>(n=876) |
|---------------------------------------|---------------------------------------------------------|-------------------------------------------------|
| <b>Treatment</b>                      |                                                         |                                                 |
| Observation                           | 321 (49%)                                               | 428 (49%)                                       |
| Capecitabine                          | 337 (51%)                                               | 448 (51%)                                       |
| <b>Age</b>                            |                                                         |                                                 |
| Mean (years)                          | 50.51                                                   | 50.27                                           |
| <b>Region</b>                         |                                                         |                                                 |
| Spain                                 | 423 (64%)                                               | 532 (61%)                                       |
| Latin America                         | 235 (36%)                                               | 344 (39%)                                       |
| <b>Race</b>                           |                                                         |                                                 |
| White                                 | 491 (74%)                                               | 622 (71%)                                       |
| Hispanic                              | 136 (21%)                                               | 204 (23%)                                       |
| African American                      | 14 (2%)                                                 | 27 (3%)                                         |
| Other                                 | 17 (3%)                                                 | 23 (3%)                                         |
| <b>Karnofsky performance status</b>   |                                                         |                                                 |
| 80                                    | 23 (4%)                                                 | 25 (3%)                                         |
| 90                                    | 95 (14%)                                                | 124 (14%)                                       |
| 100                                   | 540 (82%)                                               | 727 (83%)                                       |
| <b>Menopausal status at diagnosis</b> |                                                         |                                                 |
| Postmenopausal                        | 210 (32%)                                               | 276 (32%)                                       |
| Premenopausal                         | 448 (68%)                                               | 600 (68%)                                       |
| <b>Histological type</b>              |                                                         |                                                 |
| Invasive Ductal                       | 569 (87%)                                               | 764 (87%)                                       |
| Invasive Lobular                      | 16 (2%)                                                 | 19 (2%)                                         |
| Other                                 | 73 (11%)                                                | 93 (11%)                                        |
| <b>Histological grade</b>             |                                                         |                                                 |
| G1                                    | 16 (3%)                                                 | 27 (3%)                                         |
| G2                                    | 108 (16%)                                               | 163 (19%)                                       |
| G3                                    | 493 (75%)                                               | 622 (71%)                                       |
| GX                                    | 41 (6%)                                                 | 64 (7%)                                         |
| <b>Tumor size</b>                     |                                                         |                                                 |
| ≤ 2 cm                                | 248 (38%)                                               | 353 (40%)                                       |
| > 2 cm and ≤ 5 cm                     | 361 (55%)                                               | 462 (53%)                                       |
| > 5 cm                                | 39 (6%)                                                 | 47 (5%)                                         |
| Unknown                               | 10 (1%)                                                 | 14 (2%)                                         |
| <b>Phenotype by IHC</b>               |                                                         |                                                 |
| Triple negative Basal                 | 496 (75%)                                               | 647 (74%)                                       |
| Triple negative Non-basal             | 162 (25%)                                               | 229 (26%)                                       |
| <b>Stage at diagnosis</b>             |                                                         |                                                 |
| I                                     | 107 (16%)                                               | 136 (16%)                                       |
| II                                    | 407 (62%)                                               | 541 (62%)                                       |
| III                                   | 137 (21%)                                               | 186 (21%)                                       |

|                                                      |           |           |
|------------------------------------------------------|-----------|-----------|
| Unknown                                              | 7 (1%)    | 13 (1%)   |
| <b>Nodal status</b>                                  |           |           |
| Negative                                             | 352 (53%) | 486 (55%) |
| 1-3                                                  | 195 (30%) | 246 (28%) |
| ≥ 4                                                  | 106 (16%) | 138 (16%) |
| Unknown                                              | 5 (1%)    | 6 (1%)    |
| <b>pCR in patients with neoadjuvant chemotherapy</b> |           |           |
| No                                                   | 72 (11%)  | 123 (14%) |
| Yes                                                  | 17 (3%)   | 41 (5%)   |
| Unknown                                              | 569 (86%) | 712 (81%) |
| <b>Type of prior chemotherapy</b>                    |           |           |
| Adjuvant                                             | 564 (86%) | 706 (80%) |
| Neoadjuvant                                          | 89 (13%)  | 164 (19%) |
| Unknown                                              | 5 (1%)    | 6 (1%)    |
| <b>Chemotherapy regimen</b>                          |           |           |
| Anthracyclines and Taxanes                           | 442 (67%) | 591 (67%) |
| Anthracyclines without Taxanes                       | 216 (33%) | 285 (33%) |
| <b>Breast surgery</b>                                |           |           |
| Conservative                                         | 372 (56%) | 479 (55%) |
| Mastectomy                                           | 280 (43%) | 390 (44%) |
| Unknown                                              | 6 (1%)    | 7 (1%)    |
| <b>Axillary surgery</b>                              |           |           |
| ALND ± SLNB                                          | 486 (74%) | 655 (75%) |
| SLNB                                                 | 172 (26%) | 221 (25%) |
| <b>Radiation therapy</b>                             |           |           |
| No                                                   | 518 (79%) | 698 (80%) |
| Yes                                                  | 135 (20%) | 172 (19%) |
| Unknown                                              | 5 (1%)    | 6 (1%)    |
| <b>Distant relapse events</b>                        |           |           |
| No                                                   | 507 (77%) | 674 (77%) |
| Yes                                                  | 151 (23%) | 202 (23%) |
| <b>Recurrence events</b>                             |           |           |
| No                                                   | 491 (75%) | 651 (74%) |
| Yes                                                  | 167 (25%) | 225 (26%) |
| <b>Death events</b>                                  |           |           |
| No                                                   | 555 (84%) | 732 (84%) |
| Yes                                                  | 103 (16%) | 144 (16%) |

Abbreviations: IHC, immunohistochemistry; pCR, pathologic complete response; ALND, axillary lymph node dissection; SLNB, sentinel lymph node biopsy.

**Supplementary Table S3: Distribution of PAM50 intrinsic subtypes in the GEICAM/CIBOMA translational study cohort.**

|                                | Observation<br>(n=321) | Capecitabine<br>(n=337) | P-value |
|--------------------------------|------------------------|-------------------------|---------|
| <b>PAM50 intrinsic subtype</b> |                        |                         |         |
| Basal-like                     | 274 (85.36%)           | 279 (82.79%)            | 0.84    |
| Her2-Enriched                  | 19 (5.92%)             | 27 (8.01%)              |         |
| Luminal A                      | 5 (1.56%)              | 7 (2.08%)               |         |
| Luminal B                      | 1 (0.31%)              | 1 (0.3%)                |         |
| Normal-like                    | 22 (6.85%)             | 23 (6.82%)              |         |
| <b>PAM50 intrinsic subtype</b> |                        |                         |         |
| PAM50 Basal                    | 274 (85.36%)           | 279 (82.79%)            | 0.43    |
| PAM50 Non-basal                | 47 (14.64%)            | 58 (17.21%)             |         |

**Supplementary Table S4: Differential gene expression analysis performed on the 164 genes included in the custom codeset comparing PAM50 non-basal vs. basal-like subtype and their biological processes.** Only genes with significant results when adjusted for multiple testing are displayed.

| Gene          | Log2 fold change | std error (log2) | Lower confidence limit (log2) | Upper confidence limit (log2) | P-value  | Adjusted P-value | Biological Process                                           |
|---------------|------------------|------------------|-------------------------------|-------------------------------|----------|------------------|--------------------------------------------------------------|
| <i>FOXA1</i>  | 5.55             | 0.27             | 5.03                          | 6.08                          | 6.53E-73 | 7.99E-71         | ER mediated signaling, Breast cancer subtyping               |
| <i>AR</i>     | 3.68             | 0.168            | 3.35                          | 4.01                          | 2.00E-80 | 7.35E-78         | Androgen receptor signalling                                 |
| <i>MLPH</i>   | 3.6              | 0.168            | 3.27                          | 3.93                          | 7.96E-78 | 1.95E-75         | Breast cancer subtyping                                      |
| <i>FGFR4</i>  | 3                | 0.149            | 2.71                          | 3.29                          | 2.69E-70 | 2.82E-68         | PI3K-AKT signaling, Breast cancer subtyping                  |
| <i>ESR1</i>   | 2.84             | 0.147            | 2.55                          | 3.13                          | 6.00E-66 | 4.89E-64         | ER mediated signaling                                        |
| <i>MAPT</i>   | 2.63             | 0.166            | 2.31                          | 2.96                          | 3.95E-48 | 1.61E-46         | Breast cancer subtyping                                      |
| <i>NATI</i>   | 2.61             | 0.125            | 2.37                          | 2.86                          | 7.79E-75 | 1.14E-72         | Breast cancer subtyping                                      |
| <i>CESI</i>   | 2.4              | 0.191            | 2.02                          | 2.77                          | 1.35E-32 | 3.68E-31         | Capecitabine metabolism                                      |
| <i>ERBB2</i>  | 1.81             | 0.0991           | 1.61                          | 2                             | 2.39E-60 | 1.59E-58         | Her2 signalling, PI3K-AKT signaling, Breast cancer subtyping |
| <i>GPR160</i> | 1.78             | 0.12             | 1.54                          | 2.01                          | 3.27E-43 | 1.26E-41         | Breast cancer subtyping                                      |
| <i>CPA3</i>   | 1.73             | 0.157            | 1.42                          | 2.04                          | 3.36E-26 | 6.86E-25         | Mast cell signature                                          |

|                |       |        |       |       |          |          |                                                                               |
|----------------|-------|--------|-------|-------|----------|----------|-------------------------------------------------------------------------------|
| <i>TPSAB1</i>  | 1.69  | 0.154  | 1.39  | 1.99  | 5.87E-26 | 1.17E-24 | Mast cell signature, Extracellular matrix organization                        |
| <i>GRB7</i>    | 1.1   | 0.111  | 0.887 | 1.32  | 9.31E-22 | 1.55E-20 | Her2 signalling, PI3K-AKT signaling, Breast cancer subtyping                  |
| <i>JAM2</i>    | 1.04  | 0.0969 | 0.846 | 1.23  | 1.01E-24 | 1.86E-23 | Extracellular matrix organization                                             |
| <i>SLC39A6</i> | 0.947 | 0.0724 | 0.805 | 1.09  | 6.48E-35 | 1.90E-33 | Transport of small molecules, Breast cancer subtyping                         |
| <i>BLVRA</i>   | 0.922 | 0.0719 | 0.781 | 1.06  | 9.87E-34 | 2.79E-32 | Breast cancer subtyping                                                       |
| <i>CXXC5</i>   | 0.902 | 0.079  | 0.747 | 1.06  | 1.10E-27 | 2.37E-26 | ER mediated signaling, Breast cancer subtyping                                |
| <i>HOXA9</i>   | 0.867 | 0.104  | 0.663 | 1.07  | 5.53E-16 | 7.81E-15 | Transcription Misregulation pathway                                           |
| <i>MYCT1</i>   | 0.834 | 0.0935 | 0.651 | 1.02  | 4.52E-18 | 6.77E-17 | Tumor angiogenesis, endothelial signature                                     |
| <i>FHL1</i>    | 0.813 | 0.125  | 0.569 | 1.06  | 1.39E-10 | 1.50E-09 | Triple negative biology, Cancer progression EMT, tumor proliferation          |
| <i>MMRN2</i>   | 0.8   | 0.084  | 0.635 | 0.965 | 3.17E-20 | 4.95E-19 | Tumor angiogenesis, endothelial signature                                     |
| <i>CLEC14A</i> | 0.782 | 0.081  | 0.623 | 0.941 | 1.05E-20 | 1.71E-19 | Tumor angiogenesis, endothelial signature                                     |
| <i>CXorf36</i> | 0.703 | 0.0852 | 0.536 | 0.87  | 8.28E-16 | 1.15E-14 | Tumor angiogenesis, endothelial signature                                     |
| <i>TIE1</i>    | 0.671 | 0.0872 | 0.5   | 0.842 | 5.24E-14 | 6.31E-13 | Tumor angiogenesis, endothelial signature                                     |
| <i>ROBO4</i>   | 0.666 | 0.0863 | 0.497 | 0.835 | 4.62E-14 | 5.65E-13 | Tumor angiogenesis, endothelial signature                                     |
| <i>CDH5</i>    | 0.661 | 0.0842 | 0.496 | 0.826 | 1.64E-14 | 2.08E-13 | Tumor angiogenesis, endothelial signature                                     |
| <i>VCAN</i>    | 0.641 | 0.0938 | 0.457 | 0.825 | 1.86E-11 | 2.11E-10 | Extracellular matrix organization, Cancer progression EMT, Tumor angiogenesis |
| <i>FAM124B</i> | 0.641 | 0.117  | 0.411 | 0.871 | 6.50E-08 | 6.45E-07 | Tumor angiogenesis, endothelial signature                                     |
| <i>BCL6B</i>   | 0.586 | 0.13   | 0.331 | 0.84  | 7.68E-06 | 6.96E-05 | Tumor angiogenesis, endothelial signature                                     |
| <i>TCF4</i>    | 0.566 | 0.0753 | 0.418 | 0.713 | 1.91E-13 | 2.26E-12 | Cancer progression EMT                                                        |
| <i>MMP11</i>   | 0.552 | 0.158  | 0.241 | 0.862 | 0.000526 | 0.00429  | Extracellular matrix organization, Breast cancer subtyping                    |
| <i>LIFR</i>    | 0.543 | 0.116  | 0.315 | 0.771 | 3.75E-06 | 3.44E-05 | JAK1/STAT3 pathway                                                            |
| <i>KDR</i>     | 0.518 | 0.0767 | 0.367 | 0.668 | 3.24E-11 | 3.61E-10 | VEGF receptor 2, tumor angiogenesis,                                          |



|                 |        |        |        |          |          |          |                                                                                  |
|-----------------|--------|--------|--------|----------|----------|----------|----------------------------------------------------------------------------------|
|                 |        |        |        |          |          |          | endothelial signature, Extracellular matrix organization                         |
| <i>CAVI</i>     | 0.477  | 0.0948 | 0.291  | 0.663    | 6.45E-07 | 6.23E-06 | Extracellular matrix organization, Cancer progression EMT                        |
| <i>DDR2</i>     | 0.465  | 0.0828 | 0.303  | 0.628    | 2.81E-08 | 2.82E-07 | Extracellular matrix organization, Cancer progression EMT                        |
| <i>FSTL1</i>    | 0.449  | 0.083  | 0.287  | 0.612    | 8.67E-08 | 8.48E-07 | Cancer progression EMT, Tumor angiogenesis                                       |
| <i>STC1</i>     | 0.428  | 0.115  | 0.201  | 0.654    | 0.00023  | 0.00194  | Tumor angiogenesis, JAK1/STAT3 pathway                                           |
| <i>GRIA3</i>    | 0.405  | 0.162  | 0.0883 | 0.722    | 0.0124   | 0.0923   | Transcription misregulation pathway                                              |
| <i>BCL2</i>     | 0.396  | 0.116  | 0.168  | 0.624    | 0.000701 | 0.00566  | Apoptosis, ER mediated signaling, Breast cancer subtyping                        |
| <i>HEG1</i>     | 0.372  | 0.0742 | 0.226  | 0.517    | 6.97E-07 | 6.64E-06 | Cancer progression EMT                                                           |
| <i>PALMD</i>    | 0.372  | 0.116  | 0.146  | 0.599    | 0.00133  | 0.0106   | Tumor angiogenesis, endothelial signature                                        |
| <i>KLRB1</i>    | 0.331  | 0.124  | 0.0879 | 0.573    | 0.00777  | 0.0588   | Adaptive Immune System, Cytotoxic cell signature                                 |
| <i>PLCB1</i>    | 0.289  | 0.114  | 0.0658 | 0.512    | 0.0114   | 0.0852   | Signaling by WNT                                                                 |
| <i>MDM2</i>     | 0.246  | 0.0526 | 0.143  | 0.349    | 3.50E-06 | 3.25E-05 | Breast cancer subtyping, Cell cycle pathway                                      |
| <i>JAK1</i>     | 0.154  | 0.0418 | 0.0716 | 0.235    | 0.000258 | 0.00215  | JAK1/STAT3 signalling, PI3K signalling, immune response                          |
| <i>CD276</i>    | 0.153  | 0.0657 | 0.0244 | 0.282    | 0.02     | 0.145    | B7-H3 immune checkpoint molecule suppressing T cell activation and proliferation |
| <i>CCR5</i>     | -0.229 | 0.115  | -0.455 | -0.00341 | 0.0471   | 0.335    | C-C chemokine receptor type 5 involved in immune response                        |
| <i>GZMA</i>     | -0.283 | 0.138  | -0.554 | -0.0119  | 0.0411   | 0.296    | Immune response, Cytotoxic cell signature                                        |
| <i>TYMP</i>     | -0.316 | 0.0839 | -0.481 | -0.152   | 0.00018  | 0.00153  | Capecitabine metabolism, Tumor proliferation                                     |
| <i>PDCD1LG2</i> | -0.343 | 0.0909 | -0.521 | -0.165   | 0.000175 | 0.00151  | Programmed cell death 1 ligand 2,                                                |

|               |        |        |        |         |          |          |                                                                       |
|---------------|--------|--------|--------|---------|----------|----------|-----------------------------------------------------------------------|
|               |        |        |        |         |          |          | Immune checkpoint receptor molecule                                   |
| <i>PDCD1</i>  | -0.35  | 0.145  | -0.634 | -0.0667 | 0.0157   | 0.115    | Programmed cell death 1, Immune checkpoint molecule                   |
| <i>KLRD1</i>  | -0.368 | 0.122  | -0.608 | -0.129  | 0.0027   | 0.0213   | Immune response, Cytotoxic cell signature                             |
| <i>PRF1</i>   | -0.387 | 0.14   | -0.661 | -0.112  | 0.00594  | 0.0454   | Immune response, Cytotoxic cell signature                             |
| <i>NKG7</i>   | -0.394 | 0.142  | -0.672 | -0.115  | 0.00577  | 0.0446   | Natural killer cell granule protein 7, Cytotoxic cell signature       |
| <i>TGFB2</i>  | -0.503 | 0.14   | -0.776 | -0.229  | 0.000338 | 0.00279  | Extracellular matrix organization                                     |
| <i>GZMH</i>   | -0.505 | 0.17   | -0.839 | -0.172  | 0.0031   | 0.0242   | Immune response, Cytotoxic cell signature                             |
| <i>STAT1</i>  | -0.556 | 0.0986 | -0.749 | -0.363  | 2.58E-08 | 2.63E-07 | STAT pathway, Immune infiltration                                     |
| <i>CCL5</i>   | -0.575 | 0.137  | -0.843 | -0.307  | 2.98E-05 | 0.000264 | Immune response                                                       |
| <i>GNLY</i>   | -0.597 | 0.154  | -0.899 | -0.294  | 0.00012  | 0.00105  | Immune response, Cytotoxic cell signature                             |
| <i>PSMB9</i>  | -0.617 | 0.106  | -0.824 | -0.409  | 8.66E-09 | 9.08E-08 | Immune response                                                       |
| <i>RRM2</i>   | -0.629 | 0.0808 | -0.787 | -0.471  | 2.73E-14 | 3.40E-13 | Breast cancer subtyping, DNA damage repair                            |
| <i>ACTR3B</i> | -0.639 | 0.0682 | -0.773 | -0.506  | 1.18E-19 | 1.80E-18 | Breast cancer subtyping                                               |
| <i>CD8B</i>   | -0.665 | 0.152  | -0.962 | -0.367  | 1.36E-05 | 0.000122 | CD8 T cells signature                                                 |
| <i>CD274</i>  | -0.753 | 0.133  | -1.01  | -0.493  | 2.05E-08 | 2.12E-07 | Programmed cell death 1 ligand 1, Immune checkpoint receptor molecule |
| <i>PLCE1</i>  | -0.765 | 0.117  | -0.995 | -0.535  | 1.33E-10 | 1.46E-09 | Ras/MAPK signalling                                                   |
| <i>BRCA2</i>  | -0.825 | 0.0664 | -0.955 | -0.695  | 6.09E-32 | 1.54E-30 | DNA damage repair                                                     |
| <i>CCNB1</i>  | -0.848 | 0.076  | -0.997 | -0.699  | 1.43E-26 | 3.00E-25 | Breast cancer subtyping, Cell Cycle                                   |
| <i>MYBL2</i>  | -0.904 | 0.0942 | -1.09  | -0.719  | 1.70E-20 | 2.72E-19 | Breast cancer subtyping, Cell Cycle                                   |
| <i>PHGDH</i>  | -0.957 | 0.119  | -1.19  | -0.724  | 4.12E-15 | 5.40E-14 | Breast cancer subtyping                                               |
| <i>LAG3</i>   | -0.983 | 0.136  | -1.25  | -0.716  | 1.35E-12 | 1.55E-11 | Exhausted CD8 cells                                                   |
| <i>MYC</i>    | -1.03  | 0.0951 | -1.22  | -0.846  | 2.44E-25 | 4.71E-24 | Breast cancer subtyping, Cell Cycle                                   |
| <i>ORC6</i>   | -1.06  | 0.0868 | -1.23  | -0.895  | 2.65E-31 | 6.47E-30 | Breast cancer subtyping, Cell Cycle                                   |
| <i>UBE2T</i>  | -1.09  | 0.0939 | -1.27  | -0.907  | 1.74E-28 | 3.88E-27 | Breast cancer subtyping, Cell Cycle                                   |

|               |       |        |       |        |          |          |                                                                   |
|---------------|-------|--------|-------|--------|----------|----------|-------------------------------------------------------------------|
| <i>GZMB</i>   | -1.1  | 0.179  | -1.45 | -0.753 | 1.25E-09 | 1.33E-08 | Immune response, Cytotoxic cell signature                         |
| <i>SFRP1</i>  | -1.14 | 0.154  | -1.44 | -0.839 | 4.18E-13 | 4.87E-12 | Breast cancer subtyping, Cancer progression EMT, Signaling by WNT |
| <i>PTTG1</i>  | -1.19 | 0.0818 | -1.35 | -1.03  | 1.12E-41 | 3.74E-40 | Breast cancer subtyping, Cell Cycle                               |
| <i>CDH3</i>   | -1.22 | 0.122  | -1.46 | -0.98  | 4.32E-22 | 7.38E-21 | Breast cancer subtyping                                           |
| <i>ANLN</i>   | -1.25 | 0.0845 | -1.42 | -1.08  | 6.12E-43 | 2.25E-41 | Breast cancer subtyping, DNA damage repair                        |
| <i>UBE2C</i>  | -1.28 | 0.0899 | -1.45 | -1.1   | 4.47E-40 | 1.37E-38 | Breast cancer subtyping                                           |
| <i>MKI67</i>  | -1.29 | 0.0808 | -1.45 | -1.14  | 5.28E-49 | 2.28E-47 | Breast cancer subtyping, Tumor proliferation                      |
| <i>CEP55</i>  | -1.3  | 0.0895 | -1.47 | -1.12  | 1.41E-41 | 4.51E-40 | Breast cancer subtyping                                           |
| <i>CXCL10</i> | -1.3  | 0.153  | -1.6  | -1     | 1.21E-16 | 1.78E-15 | Immune response                                                   |
| <i>BIRC5</i>  | -1.32 | 0.105  | -1.52 | -1.11  | 2.02E-32 | 5.30E-31 | Breast cancer subtyping                                           |
| <i>BMP2</i>   | -1.33 | 0.165  | -1.65 | -1.01  | 3.19E-15 | 4.26E-14 | Extracellular matrix organization                                 |
| <i>EXO1</i>   | -1.39 | 0.0821 | -1.55 | -1.23  | 2.27E-53 | 1.11E-51 | Breast cancer subtyping, Cell Cycle                               |
| <i>MELK</i>   | -1.39 | 0.0864 | -1.56 | -1.22  | 1.44E-49 | 6.62E-48 | Breast cancer subtyping                                           |
| <i>ANGPT1</i> | -1.39 | 0.176  | -1.74 | -1.04  | 1.34E-14 | 1.72E-13 | Tumor angiogenesis                                                |
| <i>TYMS</i>   | -1.54 | 0.0892 | -1.72 | -1.37  | 1.88E-55 | 1.06E-53 | Breast cancer subtyping, DNA damage repair                        |
| <i>IDO1</i>   | -1.55 | 0.186  | -1.91 | -1.18  | 5.42E-16 | 7.80E-15 | Immune response                                                   |
| <i>KIF2C</i>  | -1.56 | 0.0811 | -1.71 | -1.4   | 1.59E-65 | 1.17E-63 | Immune response, DNA damage repair                                |
| <i>CDC20</i>  | -1.61 | 0.0912 | -1.79 | -1.44  | 1.37E-57 | 8.39E-56 | Breast cancer subtyping                                           |
| <i>KRT5</i>   | -1.62 | 0.197  | -2.01 | -1.24  | 8.74E-16 | 1.19E-14 | Breast cancer subtyping                                           |
| <i>CCNE1</i>  | -1.63 | 0.111  | -1.84 | -1.41  | 1.84E-42 | 6.43E-41 | Breast cancer subtyping, Cell Cycle                               |
| <i>KRT14</i>  | -1.63 | 0.336  | -2.29 | -0.976 | 1.45E-06 | 1.37E-05 | Breast cancer subtyping                                           |
| <i>CENPF</i>  | -1.66 | 0.0841 | -1.83 | -1.5   | 1.01E-68 | 9.26E-67 | Breast cancer subtyping                                           |
| <i>BCL2A1</i> | -1.66 | 0.161  | -1.98 | -1.35  | 2.65E-23 | 4.74E-22 | Transcription misregulation pathway                               |
| <i>NDC80</i>  | -1.77 | 0.0833 | -1.94 | -1.61  | 6.96E-77 | 1.28E-74 | Breast cancer subtyping                                           |
| <i>NUF2</i>   | -1.82 | 0.107  | -2.03 | -1.61  | 3.04E-54 | 1.59E-52 | Breast cancer subtyping, Cell Cycle                               |

|              |       |       |       |       |          |          |                               |
|--------------|-------|-------|-------|-------|----------|----------|-------------------------------|
| <i>KRT17</i> | -2.07 | 0.192 | -2.45 | -1.7  | 4.05E-25 | 7.63E-24 | Breast cancer subtyping       |
| <i>CCNA1</i> | -2.16 | 0.18  | -2.51 | -1.81 | 2.98E-30 | 7.07E-29 | Cell Cycle, DNA damage repair |
| <i>MIA</i>   | -2.35 | 0.199 | -2.74 | -1.96 | 2.24E-29 | 5.13E-28 | Breast cancer subtyping       |
| <i>FOXCI</i> | -2.69 | 0.12  | -2.93 | -2.46 | 6.21E-83 | 4.56E-80 | Breast cancer subtyping       |
| <i>CXCL5</i> | -2.89 | 0.287 | -3.45 | -2.33 | 2.66E-22 | 4.66E-21 | Immune response               |

**Supplementary Table S5: Multivariate survival analysis and interaction tests for the four genes and metagenes included in the prespecified hypotheses testing their association with DFS.**

| Multivariate analysis for DFS endpoint for selected biologically important genes and metagenes |                                                     |                            |                                                    |                           |                       |
|------------------------------------------------------------------------------------------------|-----------------------------------------------------|----------------------------|----------------------------------------------------|---------------------------|-----------------------|
| Gene/metagene                                                                                  | HR <sub>capecitabine</sub> (95%CI), <i>P</i> -value | Adjusted BH (capecitabine) | HR <sub>observation</sub> (95%CI), <i>P</i> -value | Adjusted BH (observation) | <i>P</i> -interaction |
| Mast cells score                                                                               | 1.18 (0.98-1.42), 0.08                              | 0.13                       | 1.3 (1.09-1.55), 0.003                             | 0.01                      | 0.31                  |
| Endothelial score                                                                              | 1.39 (0.94-2.05), 0.10                              | 0.36                       | 1.25 (0.9-1.75), 0.18                              | 0.26                      | 0.57                  |
| <i>PDL2</i> score                                                                              | 0.87 (0.65-1.17), 0.36                              | 0.13                       | 0.84 (0.65-1.09), 0.19                             | 0.26                      | 0.94                  |
| Cytotoxic cells score                                                                          | 0.84 (0.68-1.03), 0.09                              | 0.13                       | 0.93 (0.78-1.11), 0.45                             | 0.45                      | 0.48                  |
| Mast cells score in PAM50 Non-basal                                                            | 0.99 (0.5-1.96), 0.98                               | ---                        | 2.68 (1-7.21), 0.01                                | ---                       | 0.09                  |
| Mast cells score in PAM50 basal                                                                | 1.13 (0.93-1.37), 0.21                              | ---                        | 1.16 (0.96-1.4), 0.14                              | ---                       | 0.87                  |

Abbreviations: DFS, distant free survival.

**Supplementary Table S6: Multivariate survival analysis and interaction tests for the continuous expression of the 38 individual genes included in the prespecified hypotheses testing their association with DRFS.**

| <b>Multivariate analysis for the primary endpoint DRFS<br/>for selected biologically important genes and metagenes</b> |                                                           |                                           |                                                          |                                          |                      |
|------------------------------------------------------------------------------------------------------------------------|-----------------------------------------------------------|-------------------------------------------|----------------------------------------------------------|------------------------------------------|----------------------|
| <b>Gene/<br/>metagene</b>                                                                                              | <b>HR<sub>capecitabine</sub><br/>(95%CI),<br/>P-value</b> | <b>Adjusted<br/>BH<br/>(capecitabine)</b> | <b>HR<sub>observation</sub><br/>(95%CI),<br/>P-value</b> | <b>Adjusted<br/>BH<br/>(observation)</b> | <b>P-interaction</b> |
| <i>IL24</i>                                                                                                            | 1.29 (1-1.66),<br>0.06                                    | 0.58                                      | 1.2 (0.94-1.53),<br>0.16                                 | 0.65                                     | 0.39                 |
| <i>IL22RA2</i>                                                                                                         | 0.97 (0.81-1.16),<br>0.73                                 | 0.87                                      | 1.06 (0.89-1.24),<br>0.53                                | 0.80                                     | 0.61                 |
| <i>NRCAM</i>                                                                                                           | 0.88 (0.73-1.07),<br>0.19                                 | 0.72                                      | 1 (0.83-1.2),<br>0.96                                    | 0.98                                     | 0.78                 |
| <i>GRIA3</i>                                                                                                           | 1.12 (0.93-1.34),<br>0.23                                 | 0.72                                      | 1.12 (0.93-1.35),<br>0.23                                | 0.67                                     | 0.74                 |
| <i>SOCS3</i>                                                                                                           | 1.09 (0.83-1.43),<br>0.55                                 | 0.87                                      | 1.12 (0.86-1.47),<br>0.38                                | 0.74                                     | 0.74                 |
| <i>CXCL5</i>                                                                                                           | 1.12 (1-1.25),<br>0.06                                    | 0.58                                      | 0.95 (0.84-1.07),<br>0.38                                | 0.74                                     | 0.03                 |
| <i>VIT</i>                                                                                                             | 1.1 (0.87-1.4),<br>0.43                                   | 0.86                                      | 1.09 (0.9-1.3),<br>0.38                                  | 0.74                                     | 0.79                 |
| <i>MME</i>                                                                                                             | 1.08 (0.89-1.31),<br>0.45                                 | 0.86                                      | 1 (0.82-1.2),<br>0.96                                    | 0.98                                     | 0.37                 |
| <i>PLCB1</i>                                                                                                           | 1.08 (0.85-1.38),<br>0.51                                 | 0.87                                      | 1.12 (0.92-1.38),<br>0.25                                | 0.68                                     | 0.88                 |
| <i>SLC28A1</i>                                                                                                         | 0.97 (0.75-1.25),<br>0.82                                 | 0.89                                      | 0.93 (0.74-1.17),<br>0.54                                | 0.80                                     | 0.85                 |
| <i>CTSW</i>                                                                                                            | 1.04 (0.85-1.26),<br>0.71                                 | 0.88                                      | 0.91 (0.77-1.08),<br>0.28                                | 0.71                                     | 0.53                 |
| <i>CES1</i>                                                                                                            | 0.95 (0.8-1.13),<br>0.55                                  | 0.88                                      | 1.15 (0.99-1.33),<br>0.07                                | 0.63                                     | 0.06                 |
| <i>BMP2</i>                                                                                                            | 1.09 (0.89-1.33),<br>0.40                                 | 0.86                                      | 0.94 (0.78-1.14),<br>0.51                                | 0.80                                     | 0.33                 |
| <i>GZMH</i>                                                                                                            | 0.93 (0.76-1.13),<br>0.45                                 | 0.86                                      | 0.83 (0.69-1),<br>0.04                                   | 0.56                                     | 0.68                 |
| <i>TGFB2</i>                                                                                                           | 1.02 (0.84-1.23),<br>0.87                                 | 0.90                                      | 1.13 (0.94-1.35),<br>0.19                                | 0.65                                     | 0.50                 |
| <i>HAS1</i>                                                                                                            | 1.16 (0.95-1.42),<br>0.15                                 | 0.72                                      | 1.04 (0.87-1.25),<br>0.67                                | 0.93                                     | 0.55                 |
| <i>CCNA1</i>                                                                                                           | 1.19 (0.98-1.44),<br>0.09                                 | 0.58                                      | 1 (0.83-1.21),<br>0.98                                   | 0.98                                     | 0.28                 |
| <i>CXCL10</i>                                                                                                          | 0.91 (0.78-1.07),<br>0.27                                 | 0.72                                      | 0.95 (0.83-1.08),<br>0.42                                | 0.74                                     | 0.50                 |
| <i>IL6</i>                                                                                                             | 1.12 (0.92-1.35),<br>0.25                                 | 0.72                                      | 1.12 (0.93-1.36),<br>0.23                                | 0.67                                     | 0.88                 |
| <i>CCR5</i>                                                                                                            | 0.84 (0.66-1.07),<br>0.17                                 | 0.72                                      | 0.92 (0.74-1.13),<br>0.41                                | 0.74                                     | 0.34                 |
| <i>CACNA2D3</i>                                                                                                        | 0.94 (0.75-1.17),<br>0.59                                 | 0.87                                      | 1.02 (0.84-1.23),<br>0.87                                | 0.98                                     | 0.76                 |
| <i>JAK1</i>                                                                                                            | 1.09 (0.59-2.02),                                         | 0.89                                      | 1.33 (0.77-2.29),                                        | 0.71                                     | 0.45                 |

|               |                           |      |                           |      |      |
|---------------|---------------------------|------|---------------------------|------|------|
|               | 0.79                      |      | 0.30                      |      |      |
| <i>HOXA9</i>  | 1.15 (0.88-1.5),<br>0.30  | 0.72 | 1.12 (0.89-1.42),<br>0.33 | 0.74 | 0.75 |
| <i>TWIST2</i> | 1.16 (0.91-1.48),<br>0.22 | 0.72 | 1.04 (0.85-1.26),<br>0.74 | 0.93 | 0.64 |
| <i>PDL2</i>   | 0.94 (0.69-1.28),<br>0.69 | 0.88 | 0.82 (0.62-1.08),<br>0.16 | 0.65 | 0.80 |
| <i>BCL2A1</i> | 0.9 (0.74-1.1),<br>0.30   | 0.72 | 0.99 (0.85-1.16),<br>0.93 | 0.98 | 0.28 |
| <i>ANGPT1</i> | 1.26 (1.03-1.54),<br>0.03 | 0.50 | 1.11 (0.95-1.29),<br>0.18 | 0.65 | 0.20 |
| <i>LIFR</i>   | 1.05 (0.82-1.35),<br>0.68 | 0.88 | 0.98 (0.8-1.19),<br>0.82  | 0.97 | 0.71 |
| <i>IDO1</i>   | 0.97 (0.85-1.11),<br>0.65 | 0.88 | 0.88 (0.79-0.99),<br>0.04 | 0.56 | 0.55 |
| <i>PSMB9</i>  | 0.99 (0.78-1.26),<br>0.93 | 0.93 | 0.96 (0.79-1.17),<br>0.69 | 0.93 | 0.90 |
| <i>LEP</i>    | 1.21 (1.04-1.41),<br>0.01 | 0.50 | 1.02 (0.87-1.21),<br>0.77 | 0.95 | 0.20 |
| <i>STC1</i>   | 0.95 (0.75-1.21),<br>0.70 | 0.88 | 1.31 (1.03-1.66),<br>0.03 | 0.56 | 0.12 |
| <i>VIM</i>    | 0.96 (0.69-1.33),<br>0.81 | 0.89 | 1 (0.75-1.33),<br>0.98    | 0.98 | 0.88 |
| <i>KLRK1</i>  | 0.84 (0.68-1.03),<br>0.09 | 0.58 | 0.88 (0.74-1.05),<br>0.17 | 0.65 | 0.42 |
| <i>PDL1</i>   | 0.92 (0.74-1.16),<br>0.49 | 0.88 | 0.85 (0.7-1.04),<br>0.11  | 0.65 | 0.88 |
| <i>TYMP</i>   | 1.03 (0.75-1.42),<br>0.86 | 0.90 | 0.96 (0.75-1.22),<br>0.73 | 0.93 | 0.88 |
| <i>STAT1</i>  | 0.95 (0.72-1.25),<br>0.72 | 0.88 | 0.93 (0.75-1.15),<br>0.51 | 0.80 | 0.88 |
| <i>NKG7</i>   | 0.89 (0.73-1.07),<br>0.21 | 0.72 | 0.88 (0.75-1.03),<br>0.11 | 0.65 | 0.85 |

Abbreviations: DRFS, distant recurrence free survival.

**Supplementary Table S7: Multivariate survival analysis and interaction tests for the continuous expression of the 38 individual genes included in the prespecified hypotheses testing their association with OS.**

| <b>Multivariate analysis for the primary endpoint OS<br/>for selected biologically important genes and metagenes</b> |                                                           |                                           |                                                          |                                          |                      |
|----------------------------------------------------------------------------------------------------------------------|-----------------------------------------------------------|-------------------------------------------|----------------------------------------------------------|------------------------------------------|----------------------|
| <b>Gene/<br/>metagene</b>                                                                                            | <b>HR<sub>capecitabine</sub><br/>(95%CI),<br/>P-value</b> | <b>Adjusted<br/>BH<br/>(capecitabine)</b> | <b>HR<sub>observation</sub><br/>(95%CI),<br/>P-value</b> | <b>Adjusted<br/>BH<br/>(observation)</b> | <b>P-interaction</b> |
| <i>IL24</i>                                                                                                          | 1.29 (0.96-1.72),<br>0.10                                 | 0.34                                      | 1.07 (0.77-1.47),<br>0.70                                | 0.89                                     | 0.10                 |
| <i>IL22RA2</i>                                                                                                       | 0.98 (0.8-1.21),<br>0.87                                  | 0.89                                      | 1.04 (0.84-1.28),<br>0.72                                | 0.89                                     | 0.88                 |
| <i>NRCAM</i>                                                                                                         | 0.91 (0.74-1.13),<br>0.41                                 | 0.65                                      | 0.92 (0.72-1.18),<br>0.52                                | 0.89                                     | 0.40                 |
| <i>GRIA3</i>                                                                                                         | 1.26 (1.02-1.56),<br>0.04                                 | 0.27                                      | 1.07 (0.85-1.35),<br>0.56                                | 0.89                                     | 0.57                 |
| <i>SOCS3</i>                                                                                                         | 1.19 (0.86-1.65),<br>0.29                                 | 0.56                                      | 1.03 (0.75-1.42),<br>0.83                                | 0.91                                     | 0.55                 |
| <i>CXCL5</i>                                                                                                         | 1.11 (0.97-1.27),<br>0.13                                 | 0.37                                      | 0.92 (0.78-1.08),<br>0.29                                | 0.89                                     | 0.01                 |
| <i>VIT</i>                                                                                                           | 1.19 (0.89-1.59),<br>0.26                                 | 0.56                                      | 1.07 (0.84-1.36),<br>0.60                                | 0.89                                     | 0.51                 |
| <i>MME</i>                                                                                                           | 1.09 (0.87-1.37),<br>0.46                                 | 0.67                                      | 0.95 (0.75-1.21),<br>0.67                                | 0.89                                     | 0.13                 |
| <i>PLCB1</i>                                                                                                         | 1.24 (0.93-1.66),<br>0.15                                 | 0.37                                      | 1.14 (0.88-1.49),<br>0.31                                | 0.89                                     | 0.44                 |
| <i>SLC28A1</i>                                                                                                       | 0.91 (0.68-1.21),<br>0.51                                 | 0.67                                      | 1.04 (0.77-1.4),<br>0.80                                 | 0.89                                     | 0.49                 |
| <i>CTSW</i>                                                                                                          | 0.94 (0.75-1.19),<br>0.63                                 | 0.77                                      | 0.89 (0.71-1.11),<br>0.29                                | 0.89                                     | 0.88                 |
| <i>CES1</i>                                                                                                          | 1.08 (0.9-1.29),<br>0.43                                  | 0.65                                      | 1.06 (0.89-1.27),<br>0.49                                | 0.89                                     | 0.61                 |
| <i>BMP2</i>                                                                                                          | 1.18 (0.95-1.47),<br>0.14                                 | 0.37                                      | 1.04 (0.83-1.3),<br>0.73                                 | 0.89                                     | 0.26                 |
| <i>GZMH</i>                                                                                                          | 0.88 (0.7-1.12),<br>0.29                                  | 0.56                                      | 0.8 (0.63-1.01),<br>0.06                                 | 0.77                                     | 0.80                 |
| <i>TGFB2</i>                                                                                                         | 1.03 (0.81-1.29),<br>0.83                                 | 0.89                                      | 1.18 (0.95-1.48),<br>0.14                                | 0.77                                     | 0.50                 |
| <i>HAS1</i>                                                                                                          | 1.02 (0.81-1.3),<br>0.85                                  | 0.89                                      | 1.06 (0.84-1.34),<br>0.63                                | 0.89                                     | 0.78                 |
| <i>CCNA1</i>                                                                                                         | 1.24 (0.99-1.55),<br>0.07                                 | 0.28                                      | 1.1 (0.86-1.39),<br>0.46                                 | 0.89                                     | 0.40                 |
| <i>CXCL10</i>                                                                                                        | 0.82 (0.68-0.99),<br>0.04                                 | 0.27                                      | 0.97 (0.82-1.14),<br>0.70                                | 0.89                                     | 0.26                 |
| <i>IL6</i>                                                                                                           | 1.1 (0.88-1.37),<br>0.41                                  | 0.65                                      | 1.01 (0.8-1.28),<br>0.93                                 | 0.94                                     | 0.60                 |
| <i>CCR5</i>                                                                                                          | 0.74 (0.56-0.98)<br>0.03                                  | 0.27                                      | 0.96 (0.74-1.25),<br>0.78                                | 0.89                                     | 0.09                 |
| <i>CACNA2D3</i>                                                                                                      | 1.02 (0.8-1.3),<br>0.85                                   | 0.89                                      | 0.96 (0.75-1.22),<br>0.72                                | 0.89                                     | 0.55                 |
| <i>JAK1</i>                                                                                                          | 0.81 (0.39-1.65),                                         | 0.70                                      | 0.89 (0.47-1.7),                                         | 0.89                                     | 0.45                 |

|               |                           |      |                           |      |      |
|---------------|---------------------------|------|---------------------------|------|------|
|               | 0.56                      |      | 0.73                      |      |      |
| <i>HOXA9</i>  | 1.04 (0.75-1.45),<br>0.80 | 0.89 | 1.07 (0.8-1.43),<br>0.63  | 0.89 | 0.95 |
| <i>TWIST2</i> | 1.15 (0.86-1.53),<br>0.33 | 0.61 | 1.04 (0.81-1.35),<br>0.74 | 0.89 | 0.62 |
| <i>PDL2</i>   | 0.71 (0.49-1.03),<br>0.07 | 0.28 | 0.85 (0.59-1.21),<br>0.37 | 0.89 | 0.54 |
| <i>BCL2A1</i> | 0.92 (0.72-1.16),<br>0.48 | 0.67 | 1.05 (0.86-1.28),<br>0.63 | 0.89 | 0.37 |
| <i>ANGPT1</i> | 1.25 (0.99-1.59),<br>0.07 | 0.28 | 1.26 (1.04-1.52),<br>0.02 | 0.77 | 0.30 |
| <i>LIFR</i>   | 0.99 (0.74-1.32),<br>0.93 | 0.93 | 0.85 (0.65-1.11),<br>0.22 | 0.89 | 0.71 |
| <i>IDO1</i>   | 0.89 (0.76-1.04),<br>0.16 | 0.38 | 0.87 (0.75-1.01),<br>0.08 | 0.77 | 0.83 |
| <i>PSMB9</i>  | 0.81 (0.61-1.07),<br>0.14 | 0.37 | 0.96 (0.75-1.24),<br>0.77 | 0.89 | 0.53 |
| <i>LEP</i>    | 1.3 (1.09-1.57),<br>0.006 | 0.23 | 1.01 (0.82-1.24),<br>0.94 | 0.94 | 0.23 |
| <i>STC1</i>   | 0.88 (0.65-1.18),<br>0.37 | 0.65 | 1.05 (0.78-1.4),<br>0.74  | 0.89 | 0.87 |
| <i>VIM</i>    | 0.87 (0.59-1.3),<br>0.50  | 0.67 | 0.93 (0.65-1.33),<br>0.69 | 0.89 | 0.96 |
| <i>KLRK1</i>  | 0.75 (0.59-0.96),<br>0.02 | 0.27 | 0.83 (0.66-1.03),<br>0.09 | 0.77 | 0.27 |
| <i>PDL1</i>   | 0.76 (0.58-0.99),<br>0.04 | 0.27 | 0.82 (0.64-1.05),<br>0.12 | 0.77 | 0.62 |
| <i>TYMP</i>   | 0.95 (0.66-1.38),<br>0.80 | 0.89 | 0.96 (0.7-1.31),<br>0.79  | 0.89 | 0.81 |
| <i>STAT1</i>  | 0.8 (0.59-1.1),<br>0.18   | 0.40 | 0.99 (0.75-1.3),<br>0.93  | 0.94 | 0.51 |
| <i>NKG7</i>   | 0.82 (0.66-1.02),<br>0.07 | 0.28 | 0.85 (0.69-1.05),<br>0.13 | 0.77 | 0.76 |

Abbreviations: OS, overall survival.



**Supplementary Table S8: Multivariate survival analysis and interaction tests for the continuous expression of the 38 individual genes included in the prespecified hypotheses testing their association with DFS.**

| <b>Multivariate analysis for the primary endpoint DFS<br/>for selected biologically important genes and metagenes</b> |                                                           |                                           |                                                          |                                          |                      |
|-----------------------------------------------------------------------------------------------------------------------|-----------------------------------------------------------|-------------------------------------------|----------------------------------------------------------|------------------------------------------|----------------------|
| <b>Gene/<br/>metagene</b>                                                                                             | <b>HR<sub>capecitabine</sub><br/>(95%CI),<br/>P-value</b> | <b>Adjusted<br/>BH<br/>(capecitabine)</b> | <b>HR<sub>observation</sub><br/>(95%CI),<br/>P-value</b> | <b>Adjusted<br/>BH<br/>(observation)</b> | <b>P-interaction</b> |
| <i>IL24</i>                                                                                                           | 1.29 (1.01-1.63),<br>0.05                                 | 0.47                                      | 1.12 (0.89-1.41),<br>0.34                                | 0.81                                     | 0.27                 |
| <i>IL22RA2</i>                                                                                                        | 0.96 (0.81-1.14),<br>0.66                                 | 0.78                                      | 1.07 (0.91-1.25),<br>0.41                                | 0.82                                     | 0.49                 |
| <i>NRCAM</i>                                                                                                          | 0.87 (0.72-1.05),<br>0.14                                 | 0.47                                      | 1.02 (0.86-1.22),<br>0.79                                | 0.88                                     | 0.47                 |
| <i>GRIA3</i>                                                                                                          | 1.1 (0.93-1.32),<br>0.28                                  | 0.63                                      | 1.07 (0.9-1.28),<br>0.43                                 | 0.82                                     | 0.90                 |
| <i>SOCS3</i>                                                                                                          | 1.05 (0.81-1.38),<br>0.70                                 | 0.78                                      | 1.08 (0.84-1.38),<br>0.57                                | 0.85                                     | 0.76                 |
| <i>CXCL5</i>                                                                                                          | 1.1 (0.98-1.22),<br>0.11                                  | 0.47                                      | 0.96 (0.86-1.08),<br>0.50                                | 0.85                                     | 0.09                 |
| <i>VIT</i>                                                                                                            | 1.1 (0.87-1.38),<br>0.45                                  | 0.76                                      | 1.04 (0.88-1.24),<br>0.63                                | 0.8                                      | 0.70                 |
| <i>MME</i>                                                                                                            | 1.05 (0.87-1.26),<br>0.63                                 | 0.77                                      | 0.97 (0.81-1.16),<br>0.71                                | 0.87                                     | 0.40                 |
| <i>PLCB1</i>                                                                                                          | 1.08 (0.86-1.35),<br>0.53                                 | 0.76                                      | 1.14 (0.94-1.38),<br>0.18                                | 0.61                                     | 0.94                 |
| <i>SLC28A1</i>                                                                                                        | 0.93 (0.73-1.18),<br>0.54                                 | 0.76                                      | 0.95 (0.77-1.17),<br>0.62                                | 0.85                                     | 0.82                 |
| <i>CTSW</i>                                                                                                           | 0.99 (0.82-1.19),<br>0.91                                 | 0.92                                      | 0.9 (0.77-1.06),<br>0.21                                 | 0.61                                     | 0.56                 |
| <i>CES1</i>                                                                                                           | 0.97 (0.82-1.14),<br>0.71                                 | 0.78                                      | 1.13 (0.98-1.3),<br>0.10                                 | 0.61                                     | 0.11                 |
| <i>BMP2</i>                                                                                                           | 1.12 (0.93-1.35),<br>0.25                                 | 0.63                                      | 0.95 (0.79-1.13),<br>0.54                                | 0.85                                     | 0.28                 |
| <i>GZMH</i>                                                                                                           | 0.89 (0.73-1.07),<br>0.21                                 | 0.63                                      | 0.84 (0.71-0.99),<br>0.03                                | 0.49                                     | 0.77                 |
| <i>TGFB2</i>                                                                                                          | 0.98 (0.82-1.18),<br>0.82                                 | 0.87                                      | 1.14 (0.96-1.35),<br>0.14                                | 0.61                                     | 0.25                 |
| <i>HAS1</i>                                                                                                           | 1.16 (0.96-1.4),<br>0.13                                  | 0.47                                      | 1.1 (0.92-1.3),<br>0.30                                  | 0.81                                     | 0.79                 |
| <i>CCNA1</i>                                                                                                          | 1.18 (0.98-1.42),<br>0.09                                 | 0.47                                      | 0.95 (0.79-1.14),<br>0.59                                | 0.85                                     | 0.15                 |
| <i>CXCL10</i>                                                                                                         | 0.89 (0.76-1.04),<br>0.13                                 | 0.47                                      | 0.97 (0.86-1.1),<br>0.64                                 | 0.85                                     | 0.33                 |
| <i>IL6</i>                                                                                                            | 1.08 (0.9-1.3),<br>0.40                                   | 0.75                                      | 1.09 (0.92-1.3),<br>0.32                                 | 0.81                                     | 0.83                 |
| <i>CCR5</i>                                                                                                           | 0.8 (0.63-1),<br>0.05                                     | 0.47                                      | 0.92 (0.76-1.12),<br>0.42                                | 0.82                                     | 0.26                 |
| <i>CACNA2D3</i>                                                                                                       | 0.93 (0.76-1.15),<br>0.51                                 | 0.76                                      | 1 (0.84-1.2),<br>0.98                                    | 0.98                                     | 0.69                 |
| <i>JAK1</i>                                                                                                           | 0.97 (0.54-1.74),                                         | 0.92                                      | 1.4 (0.84-2.34),                                         | 0.61                                     | 0.23                 |

|               |                           |      |                           |      |      |
|---------------|---------------------------|------|---------------------------|------|------|
|               | 0.92                      |      | 0.19                      |      |      |
| <i>HOXA9</i>  | 1.1 (0.85-1.43),<br>0.45  | 0.76 | 1.06 (0.85-1.32),<br>0.63 | 0.85 | 0.65 |
| <i>TWIST2</i> | 1.1 (0.87-1.39),<br>0.42  | 0.76 | 1 (0.83-1.21),<br>0.97    | 0.98 | 0.77 |
| <i>PDL2</i>   | 0.87 (0.65-1.17),<br>0.36 | 0.73 | 0.84 (0.65-1.09),<br>0.19 | 0.61 | 0.94 |
| <i>BCL2A1</i> | 0.9 (0.75-1.09),<br>0.27  | 0.63 | 0.98 (0.85-1.13),<br>0.79 | 0.88 | 0.37 |
| <i>ANGPT1</i> | 1.23 (1.02-1.48),<br>0.04 | 0.47 | 1.11 (0.97-1.28),<br>0.15 | 0.61 | 0.28 |
| <i>LIFR</i>   | 1.14 (0.9-1.45),<br>0.27  | 0.63 | 0.96 (0.8-1.16),<br>0.70  | 0.87 | 0.36 |
| <i>IDO1</i>   | 0.94 (0.83-1.07),<br>0.36 | 0.73 | 0.89 (0.8-0.99),<br>0.04  | 0.49 | 0.66 |
| <i>PSMB9</i>  | 0.93 (0.74-1.17),<br>0.53 | 0.76 | 0.94 (0.78-1.14),<br>0.54 | 0.85 | 0.86 |
| <i>LEP</i>    | 1.21 (1.05-1.4),<br>0.01  | 0.42 | 0.99 (0.84-1.15),<br>0.86 | 0.94 | 0.09 |
| <i>STC1</i>   | 0.94 (0.75-1.18),<br>0.58 | 0.77 | 1.28 (1.02-1.61),<br>0.03 | 0.49 | 0.13 |
| <i>VIM</i>    | 0.92 (0.67-1.26),<br>0.61 | 0.77 | 1.02 (0.78-1.33),<br>0.90 | 0.95 | 0.70 |
| <i>KLRK1</i>  | 0.83 (0.69-1.01),<br>0.06 | 0.47 | 0.88 (0.75-1.03),<br>0.12 | 0.61 | 0.54 |
| <i>PDL1</i>   | 0.89 (0.72-1.1),<br>0.28  | 0.63 | 0.84 (0.7-1.01),<br>0.07  | 0.61 | 0.83 |
| <i>TYMP</i>   | 0.95 (0.7-1.28),<br>0.72  | 0.78 | 0.97 (0.77-1.22),<br>0.78 | 0.88 | 0.65 |
| <i>STAT1</i>  | 0.93 (0.71-1.2),<br>0.57  | 0.77 | 0.92 (0.75-1.13),<br>0.43 | 0.82 | 0.98 |
| <i>NKG7</i>   | 0.86 (0.72-1.02),<br>0.09 | 0.47 | 0.88 (0.76-1.03),<br>0.11 | 0.61 | 0.78 |

Abbreviations: DFS, distant free survival.

**Supplementary Table S9: Multivariate survival analysis and interaction tests restricted to the PAM50 non-basal subgroup.** Selected genes tested in an exploratory analysis where their high expression was found to be significantly associated with a higher survival on the capecitabine arm over observation are presented. Expression status was derived from the median gene expression scores. Hazard ratios, 95% confidence intervals and *P*-values are derived from Cox regression analyses adjusted for age, menopausal status, histological grade, tumor size, stage, breast surgery, region, nodal status, chemotherapy regimen and phenotype by IHC.

| Gene                                                             | Subgroup | HR <sub>capecitabine</sub> (95%CI), <i>P</i> -value | <i>P</i> -interaction |
|------------------------------------------------------------------|----------|-----------------------------------------------------|-----------------------|
| <b>Multivariate analysis for DRFS (PAM50 non-basal subgroup)</b> |          |                                                     |                       |
| <i>STC1</i>                                                      | High     | 0.51 (0.33-0.8), 0.003                              | 0.01                  |
|                                                                  | Low      | 1.24 (0.74-2.09), 0.41                              |                       |
| <i>CES1</i>                                                      | High     | 0.56 (0.35-0.89), 0.01                              | 0.12                  |
|                                                                  | Low      | 1 (0.61-1.62), 0.99                                 |                       |
| <i>JAK1</i>                                                      | High     | 0.57 (0.35-0.92), 0.02                              | 0.28                  |
|                                                                  | Low      | 0.96 (0.6-1.53), 0.85                               |                       |
| <i>CCR5</i>                                                      | High     | 0.61 (0.37-0.99), 0.04                              | 0.39                  |
|                                                                  | Low      | 0.89 (0.57-1.41), 0.63                              |                       |
| <i>SOCS3</i>                                                     | High     | 0.6 (0.37-0.97), 0.04                               | 0.58                  |
|                                                                  | Low      | 0.79 (0.49-1.26), 0.32                              |                       |
| <b>Multivariate analysis for DFS (PAM50 non-basal subgroup)</b>  |          |                                                     |                       |
| <i>STC1</i>                                                      | High     | 0.54 (0.35-0.82), 0.004                             | 0.02                  |
|                                                                  | Low      | 1.19 (0.74-1.93), 0.47                              |                       |
| <i>CES1</i>                                                      | High     | 0.59 (0.38-0.93), 0.02                              | 0.17                  |
|                                                                  | Low      | 0.96 (0.61-1.51), 0.85                              |                       |
| <i>JAK1</i>                                                      | High     | 0.57 (0.36-0.91), 0.02                              | 0.28                  |
|                                                                  | Low      | 0.93 (0.6-1.45), 0.75                               |                       |
| <i>CCR5</i>                                                      | High     | 0.58 (0.36-0.93), 0.02                              | 0.27                  |
|                                                                  | Low      | 0.93 (0.6-1.42), 0.73                               |                       |
| <i>SOCS3</i>                                                     | High     | 0.6 (0.37-0.96), 0.03                               | 0.62                  |
|                                                                  | Low      | 0.79 (0.51-1.22), 0.28                              |                       |
| <b>Multivariate analysis for OS (PAM50 non-basal subgroup)</b>   |          |                                                     |                       |
| <i>CCR5</i>                                                      | High     | 0.49 (0.26-0.89), 0.02                              | 0.05                  |
|                                                                  | Low      | 1.29 (0.75-2.23), 0.36                              |                       |
| <i>PDL2</i>                                                      | High     | 0.53 (0.29-0.98), 0.04                              | 0.07                  |
|                                                                  | Low      | 1.27 (0.74-2.18), 0.39                              |                       |

**Supplementary Table S10: Exploratory analysis for the prognostic capacity of the continuous expression of genes and metagenes restricted to the PAM50 non-basal subgroup.** Selected genes and metagenes tested in the exploratory prognostic analysis that were significantly associated with survival are displayed.

| Endpoint | Gene/<br>Metagene | Variable<br>type | Univariate HR<br>(95%CI)<br>PAM50 Non-<br>basal | Univariate<br><i>P</i> -value<br>PAM50<br>Non-basal | Multivariate HR<br>(95%CI)<br>PAM50 Non-<br>basal | Multivariate<br><i>P</i> -value<br>PAM50<br>Non-basal |
|----------|-------------------|------------------|-------------------------------------------------|-----------------------------------------------------|---------------------------------------------------|-------------------------------------------------------|
| DRFS     | Mast cells        | Continuous       | 1.62 (1.09-2.4)                                 | 0.01                                                | 1.56 (0.96-2.54)                                  | 0.05                                                  |
| OS       | Mast cells        | Continuous       | 1.87 (1.16-3.01)                                | 0.005                                               | 1.78 (0.99-3.18)                                  | 0.03                                                  |
| DRFS     | Endothelial       | Continuous       | 1.73 (1.03-2.92)                                | 0.05                                                | 2.15 (1.06-4.36)                                  | 0.04                                                  |
| OS       | Endothelial       | Continuous       | 1.73 (0.94-3.2)                                 | 0.09                                                | 2.52 (1.09-5.86)                                  | 0.03                                                  |
| DRFS     | <i>KLRK1</i>      | Continuous       | 1.01 (0.73-1.4)                                 | 0.96                                                | 0.6 (0.36-0.98)                                   | 0.04                                                  |
| DRFS     | <i>ANGPT1</i>     | Continuous       | 1.53 (0.97-2.43)                                | 0.07                                                | 1.88 (1.03-3.44)                                  | 0.04                                                  |
